# Supplementary material
Source: publisher figshare collection journal article supplement (https://frontiersin.figshare.com/ndownloader/files/16235414)
Supplement: Supplementary file [file 16235414]

## Supplementary information

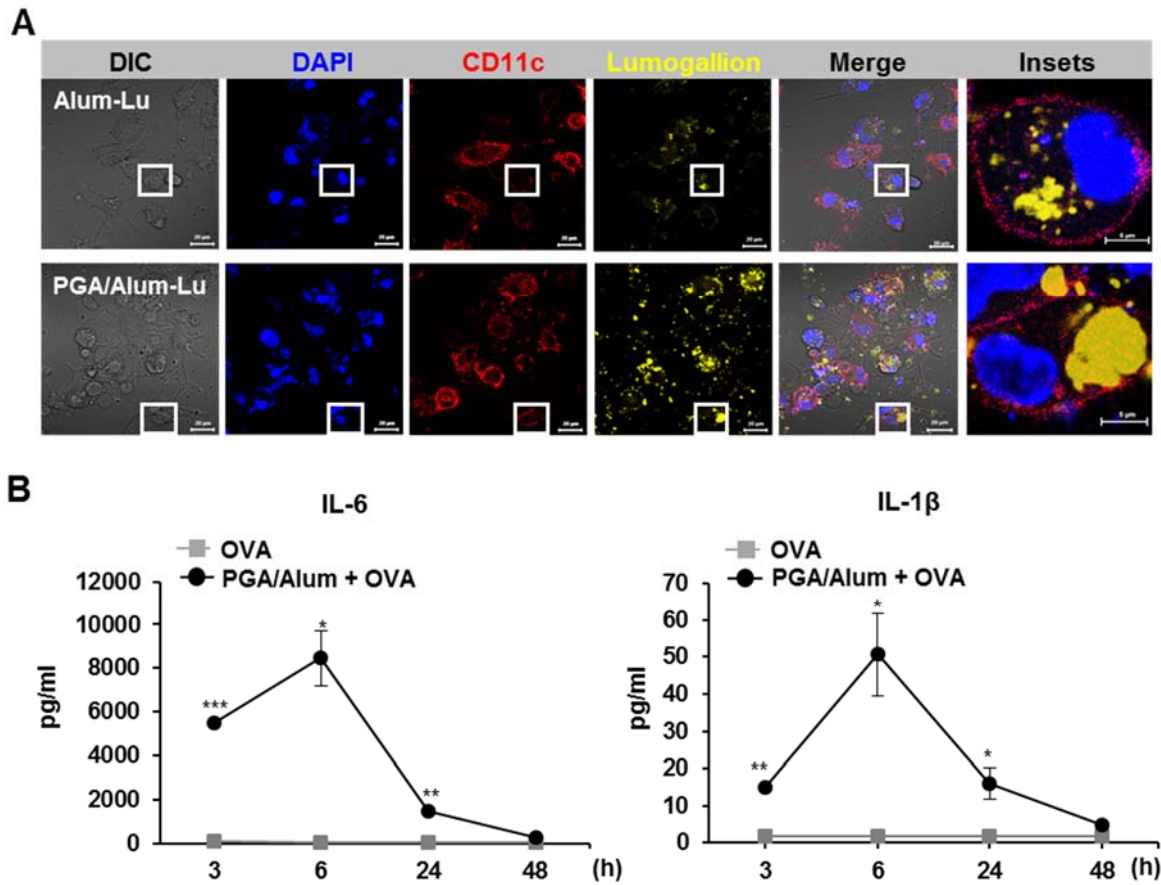

**Supplementary Figure 1.** PGA/Alum is efficiently taken up by BMDC *in vitro* and induces a rapid and transient local inflammatory response *in vivo*. (A) Fluorescent dyes-conjugated alum and PGA/Alum were prepared by labeling with 100  $\mu$ M lumogallion, a fluorimetric reagent for the detection of alum. BMDCs were incubated with lumogallion-labeled alum (alum-Lu) at 100  $\mu$ g/ml or lumogallion-labeled PGA/Alum (PGA/Alum-Lu) at 200  $\mu$ g/ml for 4 h at 37°C. The cells were then stained with anti-CD11c antibody (red). Nuclei were counterstained with DAPI (blue). Signal intensities of lumogallion (yellow) were observed to evaluate cellular uptake of PGA/Alum by BMDCs via immunofluorescent microscopic analysis (scale bar 20  $\mu$ m, and 5  $\mu$ m for insets). (B) C57BL/6 mice ( $n = 3$  per group) were i.m immunized in tibialis anterior with 5  $\mu$ g OVA alone or combined with 800  $\mu$ g PGA/Alum. At 3, 6, 24, and 48 h post-immunization, levels of cytokines were determined in the tissue homogenates of the injected muscles using a Legendplex immunoassay kit. The data are presented as a mean  $\pm$  SD, and statistically significant differences were analyzed by student *t*-test; \* $P < 0.05$ , \*\* $P < 0.01$ , and \*\*\* $P < 0.001$ .

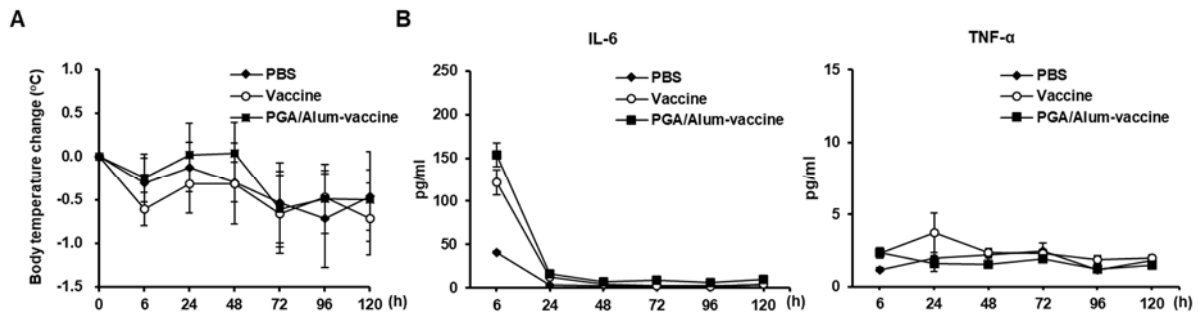

**Supplementary Figure 2.** Immunization of PGA/Alum-vaccine has no significant changes of systemic inflammation. C57BL/6 mice ( $n = 6$  per group) were i.m immunized in tibialis anterior with PBS, 0.05  $\mu\text{g}$  pH1N1 vaccine alone or combined with 800  $\mu\text{g}$  PGA/Alum. At indicated time points, (A) body temperature was measured using a rectal probe and (B) levels of inflammatory cytokines (IL-6 and TNF- $\alpha$ ) were determined in sera from the vaccinated mice using a Legendplex immunoassay kit. The data are presented as a mean  $\pm$  SD.

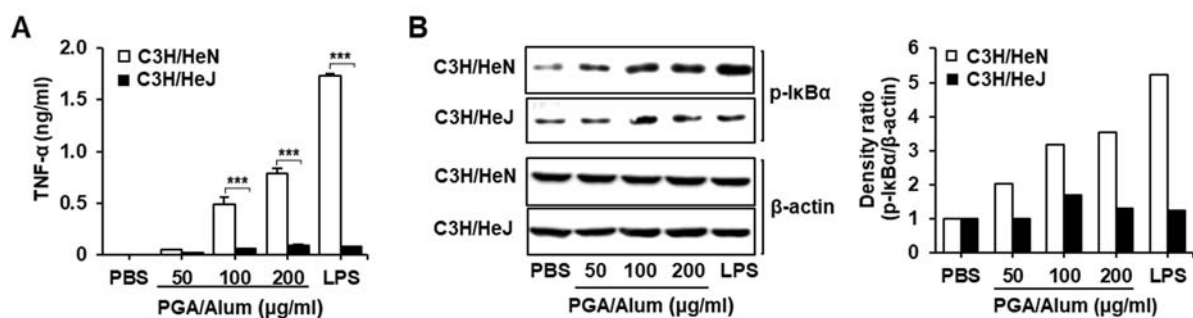

**Supplementary Figure 3.** PGA/Alum-induced DC activation is mediated through TLR4. Immature BMDCs were generated from C3H/HeN and C3H/HeJ mice. (A) The cells were stimulated with 50, 100, and 200  $\mu\text{g/ml}$  PGA/Alum or 0.1  $\mu\text{g/ml}$  LPS (as a positive control) for 24 h, and ELISA was used to measure TNF- $\alpha$  levels in culture supernatants. The data are presented as a mean  $\pm$  SD. Statistically significant differences were analyzed by student's *t*-test; \*\*\* $P < 0.001$ . (B) BMDCs were serum-starved for 3 h and stimulated with PGA/Alum at various concentration or 0.1  $\mu\text{g/ml}$  LPS for 30 min. Phosphorylated I $\kappa$ B $\alpha$  and  $\beta$ -actin were determined by Immunoblotting, and band intensities were quantified by the ImageJ software. The data are representative of three independent experiments.

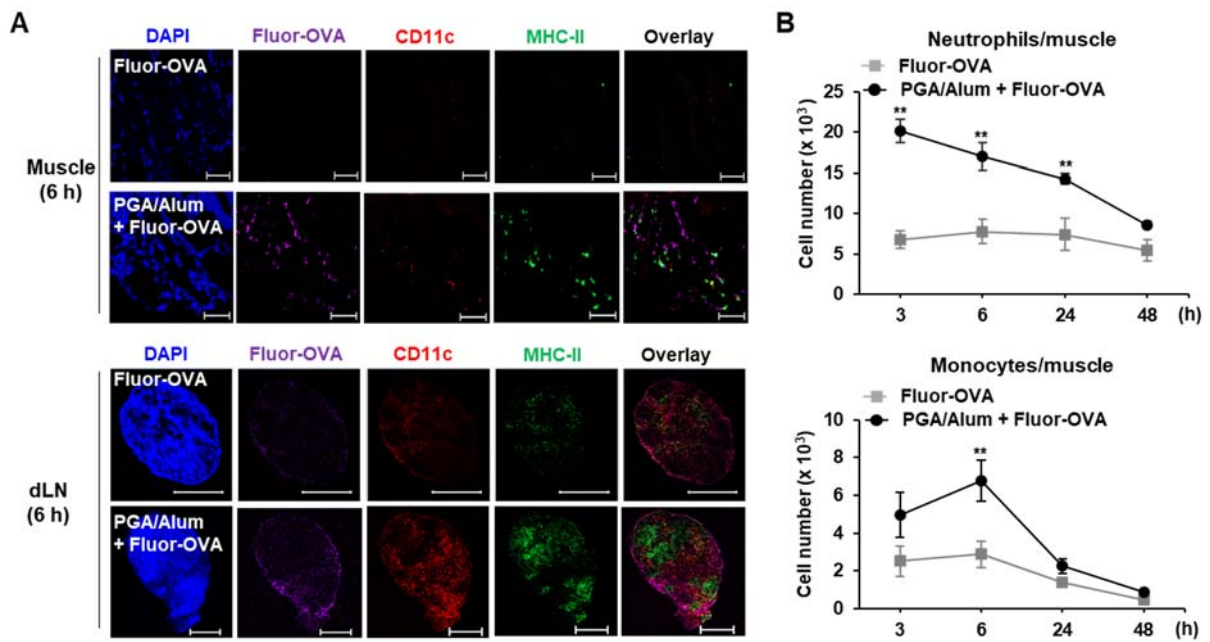

**Supplementary Figure 4.** PGA/Alum highly induces recruitment of DCs, neutrophils, and monocytes at the site of injection as well as accumulation of DCs at the dLN. C57BL/6 mice ( $n = 3$  per group) were i.m immunized in tibialis anterior with 5  $\mu\text{g}$  Fluor-OVA alone (purple) or combined with 800  $\mu\text{g}$  PGA/Alum. (A) Immunofluorescent microscopic analysis was performed on frozen sections of injected muscles and dLNs obtained from mice at 6 h post-injection. Sections were stained with DAPI (blue) and antibodies against CD11c (red) and MHC-II (green) (scale bars, 50  $\mu\text{m}$  for muscle and 500  $\mu\text{m}$  for dLNs). (B) The number of neutrophils (gated as  $\text{SSC}^{\text{high}}\text{Ly6G}^{\text{high}}$ ) and monocytes (gated as  $\text{CD11c}^{\text{low}}\text{CD11b}^{\text{high}}\text{Ly6C}^{\text{high}}$ ) at the injected muscles was determined by flow cytometry. The data are presented as a mean  $\pm$  SD and representative of three independent experiments. Statistically significant differences were analyzed by student's *t-test*; \*\* $P < 0.01$ .

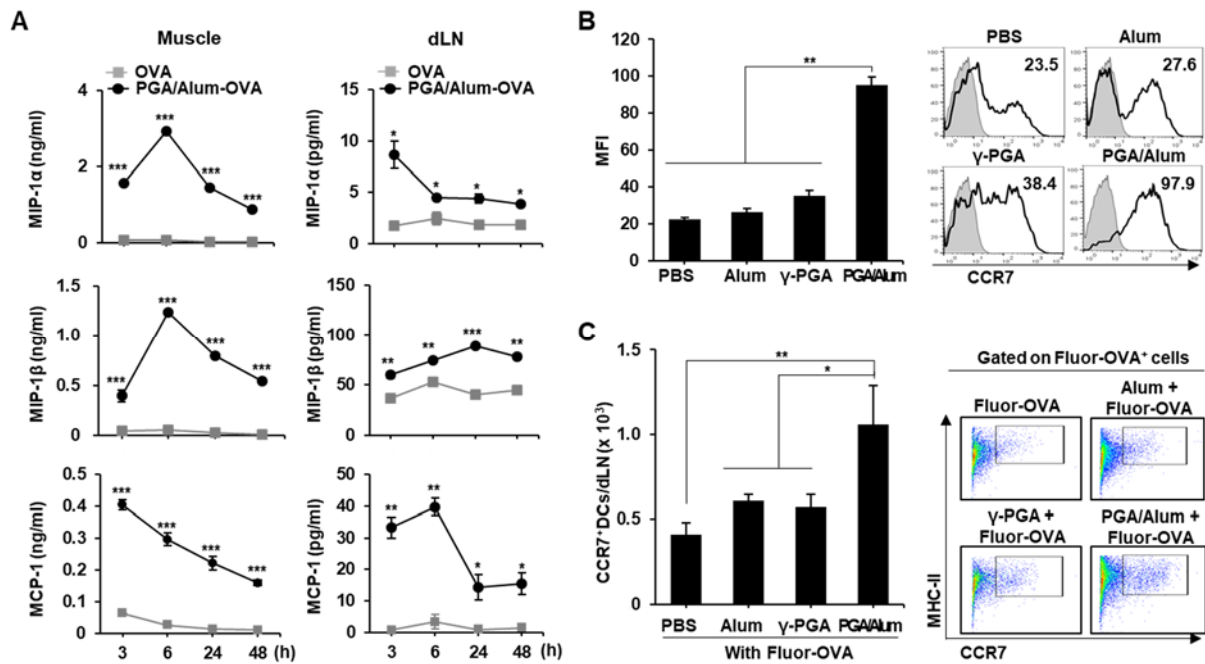

**Supplementary Figure 5.** PGA/Alum increases production of chemokines and expression of CCR7 on DCs. (A) C57BL/6 mice ( $n = 3$  per group) were i.m immunized in tibialis anterior with 5  $\mu$ g OVA alone or combined with 800  $\mu$ g PGA/Alum. At 3, 6, 24, and 48 h post-immunization, levels of chemokines were determined in the tissue homogenates of the injected muscles and dLNs using a Legendplex immunoassay kit. (B) Immature BMDCs were treated with 100  $\mu$ g/ml alum, 100  $\mu$ g/ml  $\gamma$ -PGA, or 200  $\mu$ g/ml PGA/Alum for 24 h. Expression of CCR7 on the BMDCs was determined by flow cytometry. The number in histogram indicates MFI values. (C) C57BL/6 mice ( $n = 3$  per group) were i.m immunized in tibialis anterior with 5  $\mu$ g Fluor-OVA alone or combined with 400  $\mu$ g alum, 400  $\mu$ g  $\gamma$ -PGA, or 800  $\mu$ g PGA/Alum. Twenty-four hours post-immunization, expression of CCR7 on Fluor-OVA<sup>+</sup>MHC-II<sup>+</sup> cells of the dLNs was determined by flow cytometry. The data are presented as a mean  $\pm$  SD and representative of three independent experiments. Statistically significant differences were analyzed by ANOVA/Bonferroni; \* $P < 0.05$ , \*\* $P < 0.01$ , and \*\*\* $P < 0.001$ .

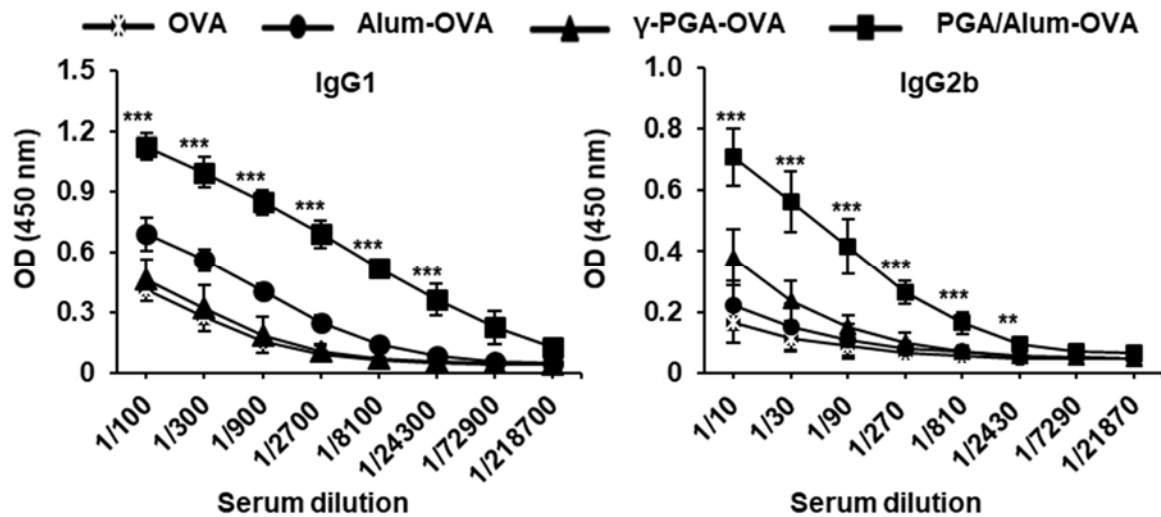

**Supplementary Figure 6.** PGA/Alum enhances levels of OVA-specific IgG1 and IgG2b antibodies. C57BL/6 mice were i.m immunized with 10  $\mu$ g OVA protein alone or combined with either 400  $\mu$ g alum, 400  $\mu$ g  $\gamma$ -PGA, or 800  $\mu$ g PGA/Alum on days 0, 14 and 28. Fourteen days after the last immunization, sera were obtained from the immunized mice and analyzed to determine levels of OVA-specific IgG1 and IgG2b antibodies by ELISA. Data are representative of three independent experiments with similar results. Statistically significant differences were identified by ANOVA/Bonferroni; \*\* $P < 0.01$  and \*\*\* $P < 0.001$ .

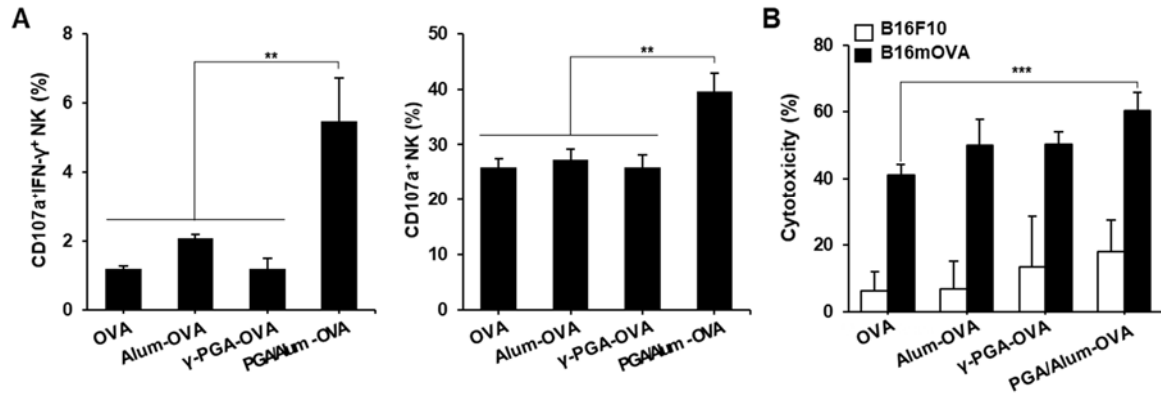

**Supplementary Figure 7.** Serum Abs of PGA/Alum-OVA-immunized mice effectively enhance NK cell activation facilitating ADCC activity. C57BL/6 mice ( $n = 5$  per group) were i.m immunized with 10  $\mu$ g OVA protein alone or combined with either 400  $\mu$ g alum, 400  $\mu$ g  $\gamma$ -PGA or 800  $\mu$ g PGA/Alum 3 times at 2-week intervals. Fourteen days after the last immunization, sera were obtained from the mice and heat-inactivated at 56°C for 1 h. (A) OVA-coated plates were incubated with the sera, washed, and then further incubated with naïve NK cells in the presence of PE-conjugated anti-CD107a mAb, monensin, and brefeldin A at 37°C for 5 h. The cells were fixed, permeabilized, and stained with APC-conjugated anti-IFN- $\gamma$  mAb. The stained cells were analyzed for expression of CD107a and IFN- $\gamma$  by flow cytometry. (B) B16mOVA or B16F10 cells were incubated with heat-inactivated sera (56°C, 1 h) and naïve NK cells for 4 h, and the culture supernatants were subjected to LDH assays to detect ADCC-mediated cytolytic activity. The data are presented as a mean  $\pm$  SD and representative of three independent experiments. Statistically significant differences were identified by ANOVA/Bonferroni; \*\* $P < 0.01$  and \*\*\* $P < 0.001$ .

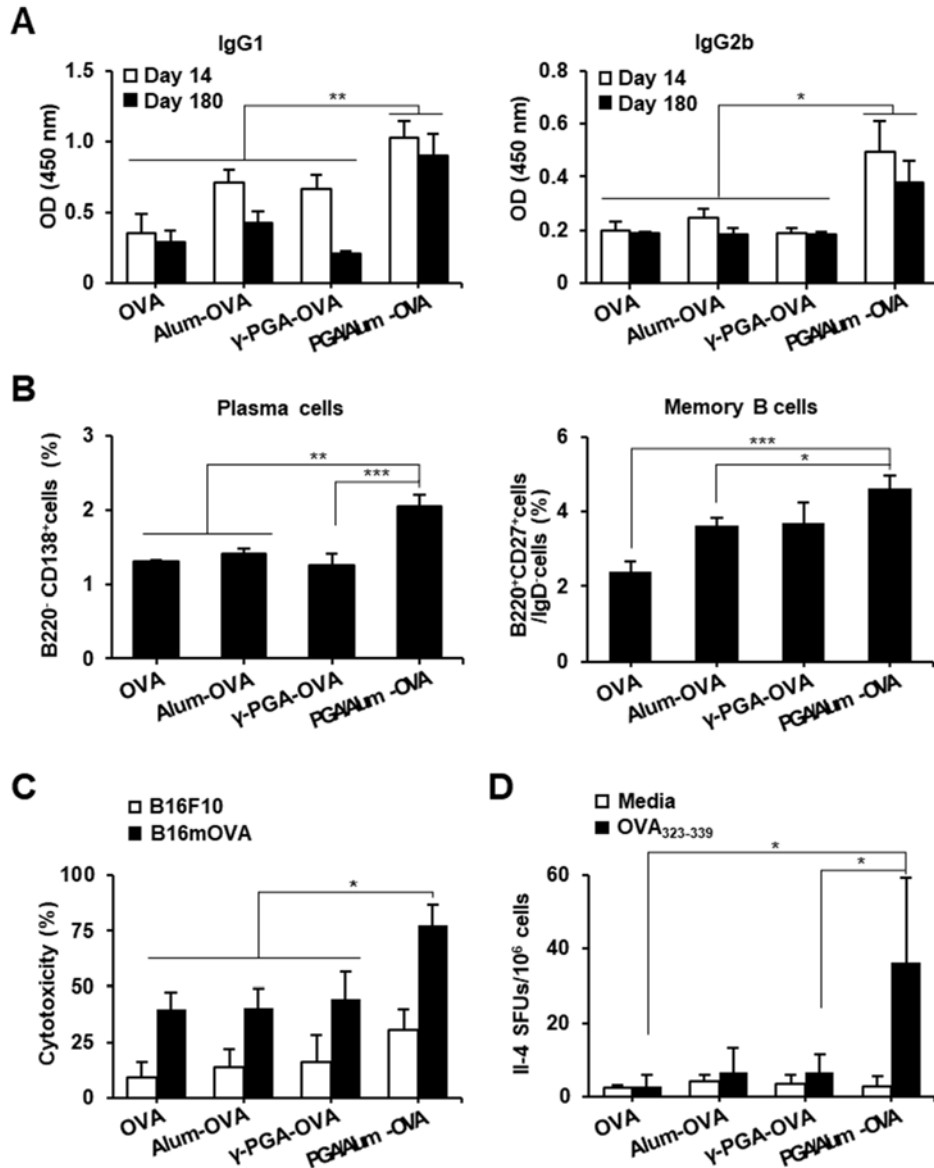

**Supplementary Figure 8.** PGA/Alum-OVA-immunized mice maintain long-lasting immune responses. C57BL/6 mice ( $n = 5$  per group) were i.m immunized 3 times at 2-weeks intervals with 10  $\mu\text{g}$  OVA protein alone or with either 400  $\mu\text{g}$  alum, 400 $\mu\text{g}$   $\gamma$ -PGA, or 800  $\mu\text{g}$  PGA/Alum. (A) Sera were isolated from the immunized mice on days 14 and 180 after the last immunization. Levels of OVA-specific IgG subclasses (IgG1 and IgG2b) were determined in the sera by ELISA. (B) Splenocytes from the immunized mice were obtained on day 180 post-immunization. Percentages of plasma cell populations (gated as CD138<sup>+</sup>B220<sup>+</sup>) and memory B cells (gated as CD27<sup>+</sup>B220<sup>+</sup>IgD<sup>-</sup>) in the splenocytes were analyzed by flow cytometry. (C) B16mOVA cells were incubated with the sera (heat-inactivated, 56°C, 1h) and naïve NK cells for 4 h at 37°C. Culture supernatants were subjected to LDH assays for ADCC-mediated cytolytic activity. (D) Splenocytes were stimulated with 5  $\mu\text{g}/\text{ml}$  OVA<sub>323-339</sub> peptides for 3 days, and the number of IL-4-secreting SFUs was measured by ELISPOT assay. The data are presented as a mean  $\pm$  SD and representative of three independent experiments. Statistically significant differences were analyzed by ANOVA/Bonferroni; \* $P < 0.05$ , \*\* $P < 0.01$ , and \*\*\* $P < 0.001$ .



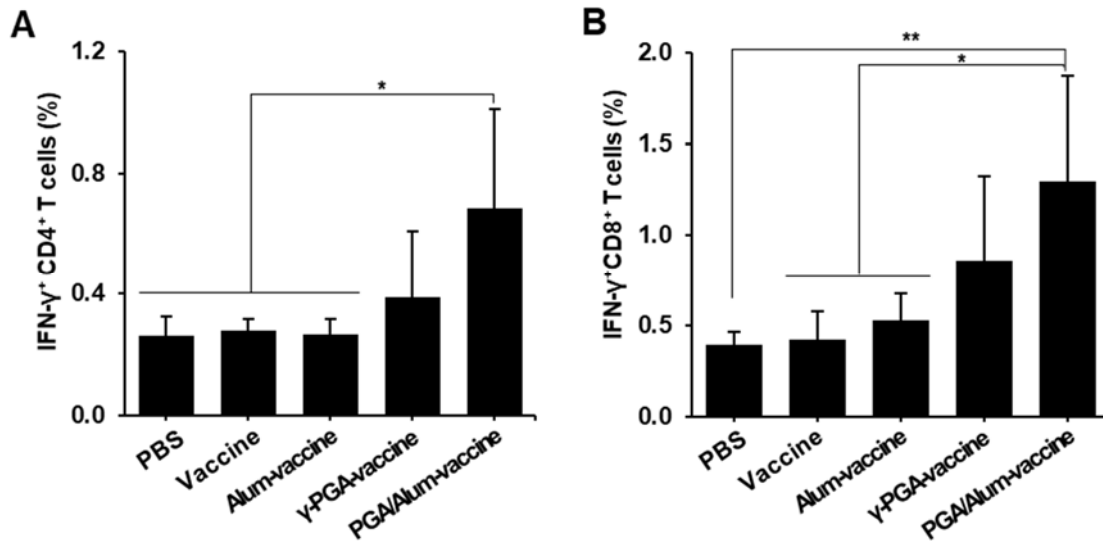

**Supplementary Figure 9.** PGA/Alum improves influenza virus antigen-specific T cell responses. C57BL/6 mice ( $n = 6$  per group) were i.m. immunized with pandemic influenza vaccine alone or combined with 400  $\mu$ g alum, 400  $\mu$ g  $\gamma$ -PGA, or 800  $\mu$ g PGA/Alum on days 0 and 14. Two weeks after the final administration, splenocytes were obtained from the immunized mice and stimulated with 500 TCID<sub>50</sub> UV-inactivated pH1N1 virus. Percentages of influenza virus antigen-specific IFN- $\gamma^+$ CD4 $^+$  T cells (A) and IFN- $\gamma^+$  CD8 $^+$  T cells (B) were analyzed by flow cytometry. Data are representative of three independent experiments. Statistically significant differences were analyzed by ANOVA/Bonferroni; \* $P < 0.05$  and \*\* $P < 0.01$ .

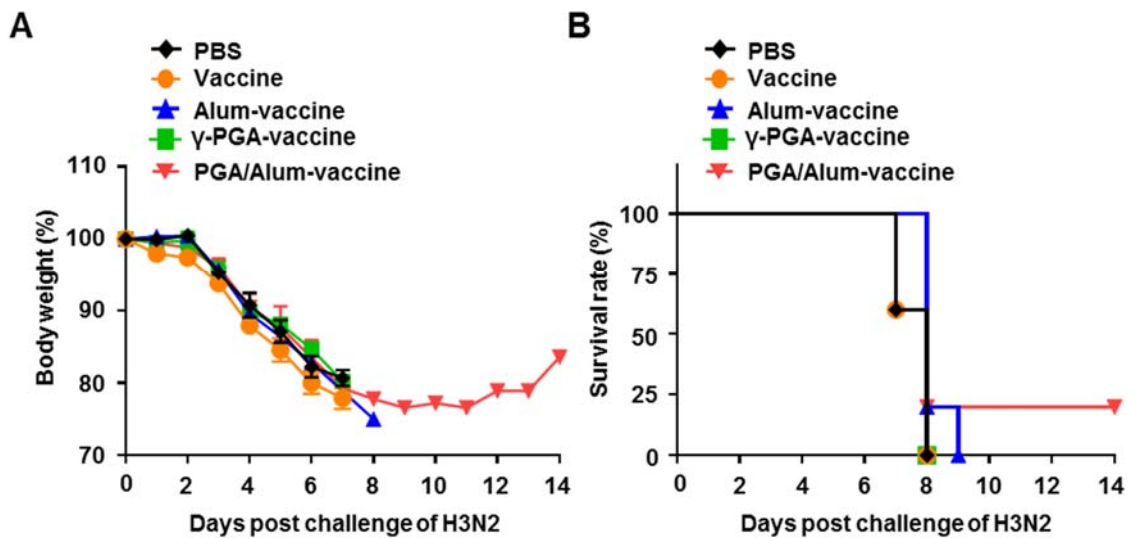

**Supplementary Figure 10.** Serum Abs from the PGA/Alum-pH1N1 vaccine group partially contribute to *in vivo* cross-protection against H3N2 virus. C57BL/6 mice ( $n = 5$  per group) were twice immunized with  $0.5 \mu\text{g}$  the pH1N1 split vaccine alone or combined with  $400 \mu\text{g}$  alum,  $400 \mu\text{g}$   $\gamma$ -PGA, or  $800 \mu\text{g}$  PGA/Alum at 2-week intervals. Two weeks after the final immunization, sera were obtained and heat-inactivated at  $56^\circ\text{C}$  for 1 h. The heat-inactivated sera were mixed with  $2 \text{LD}_{50}$  H3N2 virus at room temperature for 30 min, and then Balb/c mice ( $n = 5$  per group) were i.n. infected with the mixture. (A) Body weight and (B) survival rate were monitored for 14 days after the viral challenge.

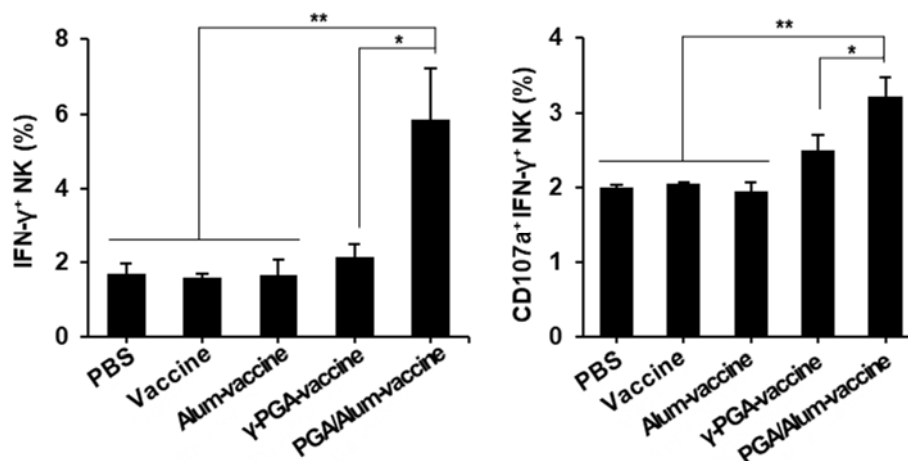

**Supplementary Figure 11.** Serum Abs from PGA/Alum-vaccine group drastically activate NK cells. C57BL/6 mice ( $n = 6$  per group) were i.m. immunized with the pandemic H1N1 split vaccine antigen combined with  $400 \mu\text{g}$  alum,  $400 \mu\text{g}$   $\gamma$ -PGA, or  $800 \mu\text{g}$  PGA/Alum on days 0 and 14. Fourteen days after the last immunization, sera were obtained from the mice and heat-inactivated at  $56^\circ\text{C}$  for 1 h. HA stem region antigen-coated plates were incubated with the sera, washed, and then further incubated with naïve NK cells in the presence of PE-conjugated anti-CD107a mAb, monensin, and brefeldin A at  $37^\circ\text{C}$  for 5 h. The cells were fixed, permeabilized, and stained with APC-conjugated anti-IFN- $\gamma$  mAb. The stained cells were analyzed for expression of CD107a and IFN- $\gamma$  by flow cytometry. The data are presented as a mean  $\pm$  SD and representative of three independent experiments. Statistically significant differences were identified by ANOVA/Bonferroni;  $*P < 0.05$  and  $**P < 0.01$ .

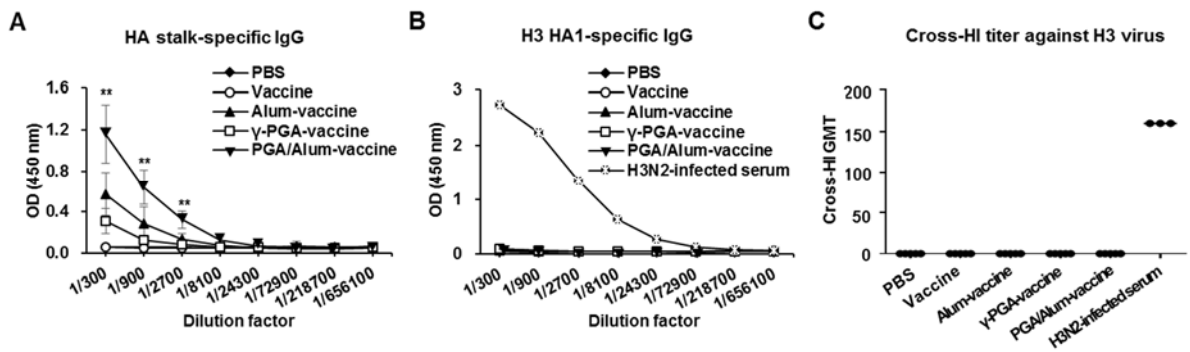

**Supplementary Figure 12.** PGA/Alum-vaccine-immunized mice increase the level of H1 HA stalk-specific Abs but not H3 HA1-specific Abs and cross-reactive neutralizing Abs. C57BL/6 mice ( $n = 5$  per group) were twice immunized with  $0.5 \mu\text{g}$  the pH1N1 split vaccine alone or combined with  $400 \mu\text{g}$  alum,  $400 \mu\text{g}$   $\gamma$ -PGA, or  $800 \mu\text{g}$  PGA/Alum at 2-week intervals. Two weeks after the final immunization, sera were obtained from the immunized mice. Levels of serum IgG specific to (A) HA stalk region of A/Puerto Rico/8/34 (H1N1) virus or (B) HA1 of A/HongKong/1/68 (H3N2) virus were determined by ELISA. (C) Serum HI titer against H3N2 virus were measured. Serum from the mice infected with  $0.1 \text{ LD}_{50}$  H3N2 virus was used as a positive control. The data are presented as a mean  $\pm$  SD, and statistically significant differences were identified by ANOVA/Bonferroni;  $**P < 0.01$ .
